# Supplementary material
Source: Springer Nature journal article supplement (https://www.springermedizin.de/resource/supplementary/12888_2011_838_MOESM2_ESM.pdf/9478932)

Untreated clients, every 4 months

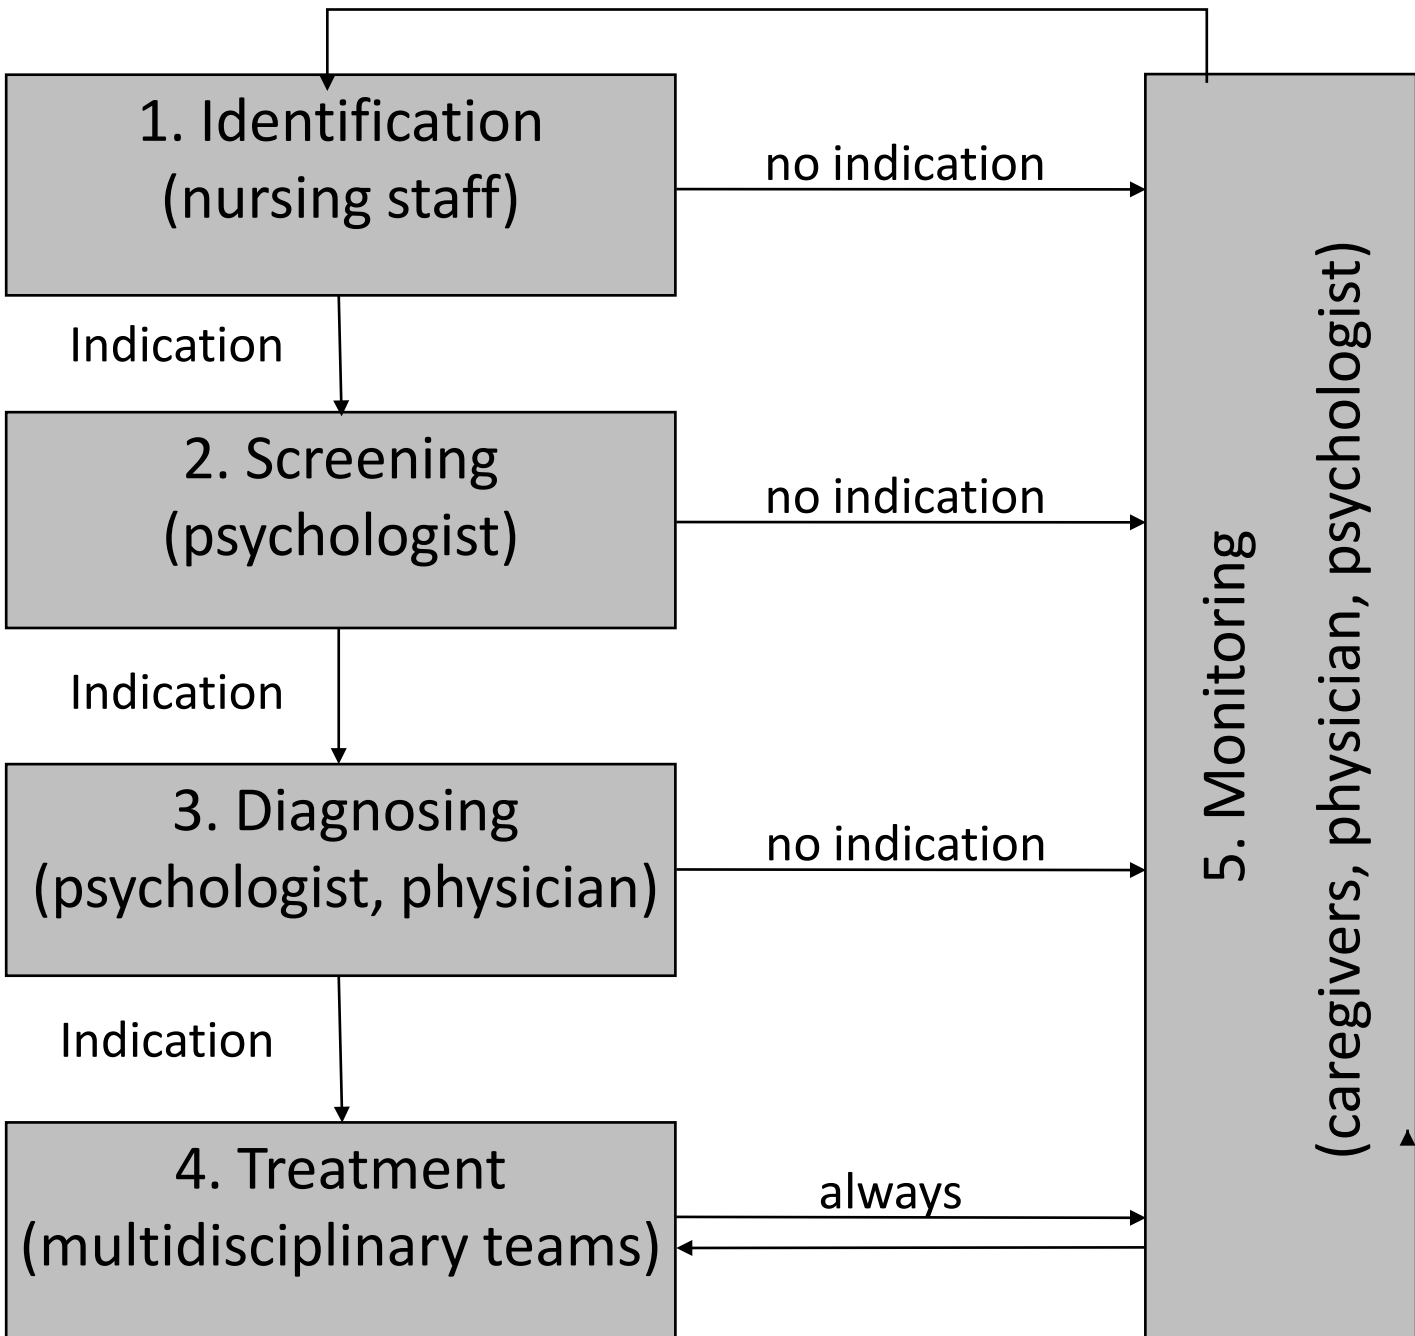

Supplement: MOESM2 [file 9478932]
